# Supplementary material
Source: PubMed Central journal article supplement (PMC2570975)
Supplement: 0801151105_Appendix_PDF.pdf [file 0801151105_Appendix_PDF.pdf]

# The Age-specific Incidence of Cancer: phases, transitions and biological implications

## Supplementary Information

### A Hazard and Survival Function of the MSCE model

Figure 1 shows a schematic representation of the  $k$ -stage MSCE model. In this model, cells arrive in the first pre-initiation stage according to a Poisson process with intensity  $\mu_0 X$ , where  $X$  is the number of normal susceptible cells. A cell in the  $i$ th pre-initiation stage can divide into one  $i$ th pre-initiated cell and one  $(i + 1)$ th pre-initiated cell with rate  $\mu_i$ , for  $i = 1, \dots, k - 3$ . A  $(k - 2)$ th pre-initiated cell can divide into one  $(k - 2)$ th pre-initiated cell and one initiated cell with rate  $\mu_{k-2}$ . Once a cell is initiated, it expands clonally via a birth-death-mutation process with rates  $\alpha, \beta, \mu_{k-1}$ , respectively. The hazard and survival functions for the multistage clonal expansion (MSCE) model have been derived previously [1, 2]. In particular, the survival function for the  $k$ -stage model,  $S_k(t)$  ( $k \geq 3$ ), can be calculated iteratively by

$$S_{k,j}(t) = \exp \left( -\mu_{k-j} \int_0^t (1 - S_{k,j-1}(t-u)) du \right), \quad (1)$$

for  $j = 3, \dots, k$ , where  $S_k(t) = (S_{k,k}(t))^X$  and

$$S_{k,2}(t) = \left( \frac{q - p}{qe^{-pt} - pe^{-qt}} \right)^{\mu_{k-2}/\alpha}. \quad (2)$$

Here,

$$p = \frac{1}{2}(-(\alpha - \beta - \mu_{k-1}) - \sqrt{(\alpha - \beta - \mu_{k-1})^2 + 4\alpha\mu_{k-1}}), \quad (3)$$

$$q = \frac{1}{2}(-(\alpha - \beta - \mu_{k-1}) + \sqrt{(\alpha - \beta - \mu_{k-1})^2 + 4\alpha\mu_{k-1}}). \quad (4)$$

Note that  $pq = -\alpha\mu_{k-1}$  and  $(p + q) = -(\alpha - \beta - \mu_{k-1})$ .

The hazard function of the k-stage model can be obtained from

$$h_k(t) = -\frac{\partial}{\partial t} \ln S_k(t). \quad (5)$$

In particular,

$$h_2(t) = \frac{\mu_0 X}{\alpha} \left( \frac{qp(e^{-qt} - e^{-pt})}{qe^{-pt} - pe^{-qt}} \right), \quad (6)$$

$$h_3(t) = \mu_0 X \left[ 1 - \left( \frac{q-p}{qe^{-pt} - pe^{-qt}} \right)^{\mu_1/\alpha} \right], \quad (7)$$

$$h_4(t) = \mu_0 X \left( 1 - \exp \left\{ \int_0^t \mu_1 \left[ \left( \frac{q-p}{qe^{-p(t-u)} - pe^{-q(t-u)}} \right)^{\mu_2/\alpha} - 1 \right] du \right\} \right). \quad (8)$$

## B Linear, Exponential and Quadratic Phases of the 3-stage Model Hazard

### B.1 Linear Phase

The 3-stage model has the hazard function

$$h_3(t) = \mu_0 X (1 - S_2(t)), \quad (9)$$

where  $X$  is the number of susceptible stem cells,  $\mu_0$  is the mutation rate of the first hit at the tumor suppressor locus and  $S_2(t)$  represents the 2-stage ‘tumor survival’ probability given by

$$S_2(t) = \exp \left( -\mu_1 \int_0^t (1 - S_1(t-u)) du \right). \quad (10)$$

The survival function associated with the clonal expansion stage (i.e., the probability that a single clone originated at time 0 hasn’t become malignant by time  $t$ ) is:

$$S_1(t) = 1 + \frac{1}{\alpha} \frac{pq(e^{-pt} - e^{-qt})}{qe^{-pt} - pe^{-qt}}. \quad (11)$$

Let  $\xi \equiv q/(-p) > 0$ ,  $a \equiv (-p) > 0$  and  $b \equiv \alpha$ , then (11) reduces to:

$$S_1(t) = 1 + \frac{\xi a (1 - e^{(1+\xi)at})}{b(1 + \xi e^{(1+\xi)at})}, \quad (12)$$

and clearly

$$p_\infty \equiv \lim_{t \rightarrow \infty} (1 - S_1(t)) = 1 - \frac{b-a}{b} \approx 1 - \frac{\beta}{\alpha}. \quad (13)$$

$p_\infty$  also represents the probability that a single premalignant clone initiated at time 0 eventually becomes malignant.

Now,

$$h_3(t) = \mu_0 X (1 - S_2(t)) = \mu_0 X \left( 1 - e^{-\mu_1 \int_0^t (1 - S_1(t-u)) du} \right). \quad (14)$$

If  $(\mu_1 \int_0^t (1 - S_1(t-u)) du) \ll 1$ , which is the case for all  $t < \frac{1}{\mu_1 p_\infty}$ , then

$$h_3(t) \approx \mu_0 X \mu_1 \int_0^t (1 - S_1(t-u)) du. \quad (15)$$

Let  $T^*$  denote the time to malignancy for a single clone, conditional on the clone not becoming extinct (i.e., destined to become malignant) and let  $F^*(t)$  denote the cumulative distribution of this random variable, then

$$F^*(t) = \frac{1 - S_1(t)}{p_\infty} \quad (16)$$

and

$$T_s \equiv E[T^*] = \int_0^\infty (1 - F^*(u)) du = \int_0^\infty \left( 1 - \frac{1 - S_1(u)}{p_\infty} \right) du \quad (17)$$

$$= -\frac{\ln\left(\frac{\xi}{1+\xi}\right)}{a} \approx -\frac{\ln(\xi)}{a} = -\frac{\ln(q/(-p))}{-p} \approx -\frac{\ln(\alpha\mu_2/(\alpha-\beta)^2)}{\alpha-\beta}, \quad (18)$$

where the approximations are valid provided  $\mu_2 \ll 1$  (i.e., if  $-p \approx (\alpha - \beta)$ ) and  $\mu_2 < p^2/\alpha$ .

A simple calculation shows that for  $t$  large enough,

$$\int_0^t (1 - S_1(t-u)) du = p_\infty t - p_\infty T_s, \quad (19)$$

so

$$h_3(t) \approx \mu_0 X \mu_1 p_\infty (t - T_s). \quad (20)$$

We see that the 3-stage hazard behaves linearly for  $t \gg T_s$  until  $t \sim o(1/(\mu_1 p_\infty))$ . Moreover, this line is equal to zero at  $t = T_s$ , so the effective sojourn time can be identified and directly estimated from the intercept of the linear phase of the hazard with the time axis (see Figs.2 and 3).

## B.2 Exponential and Quadratic Phases

Let  $\xi \equiv q/(-p) > 0$  and  $a \equiv (-p) > 0$ , then the two-stage survival function (10) can be written as

$$S_2(t) = \left( \frac{(1+\xi)e^{\xi at}}{1+\xi e^{(1+\xi)at}} \right)^{\frac{\mu_1}{\alpha}}. \quad (21)$$

For  $\xi \ll 1$ , a Taylor series expansion of  $S_2(t)$  around  $\xi = 0$  gives

$$S_2(t) = 1 + \frac{\mu_1}{\alpha} \xi (1 + at - e^{at}) + o(\xi^2). \quad (22)$$

Thus,

$$h_3(t) = \mu_0 X (1 - S_2(t)) \approx \frac{\mu_0 X \mu_1}{\alpha} \xi (e^{at} - at - 1). \quad (23)$$

Clearly if  $at \ll 1$ , then  $S_2(t)$  can be further approximated by  $S_2(t) \approx 1 - \frac{\mu_1}{\alpha} \xi \frac{a^2 t^2}{2}$ , hence

$$h_3(t) \approx \frac{\mu_0 X \mu_1}{\alpha} \xi \frac{a^2 t^2}{2} = \frac{1}{2} \mu_0 X \mu_1 \mu_2 t^2. \quad (24)$$

## C Prevalence of Premalignant Clones

Under the 3-stage model, the probability that no premalignant clone has occurred by time  $t$ ,  $P_0(t)$ , is given by:

$$P_0(t) = \exp \left( \frac{\mu_0 X (1 - e^{-\mu_1 t})}{\mu_1} - \mu_0 X t \right). \quad (25)$$

The prevalence of premalignant clones at age  $t$ ,  $PREV(t)$ , can be approximated by

$$PREV(t) \approx (1 - P_0(t)) p_\infty = p_\infty \left( 1 - \exp \left( \frac{\mu_0 X (1 - e^{-\mu_1 t})}{\mu_1} - \mu_0 X t \right) \right). \quad (26)$$

Moreover, for early ages and assuming that  $\mu_1 \ll 1$ , the prevalence can be further approximated by  $\frac{1}{2} \mu_0 X \mu_1 p_\infty t^2$ . Thus, the slope of the linear phase of the hazard function can be interpreted as the curvature in the age-specific prevalence of the generated preneoplastic clone in a young population.

## D Linear Phase of 4-stage Model Hazard

The hazard of the 4-stage MSCE model is given by

$$h_4(t) = \mu_0 X \left[ 1 - \exp \left( -\mu_1 \int_0^t (1 - S_2(t-u)) du \right) \right], \quad (27)$$

where in this case

$$S_2(t) = \left( \frac{q-p}{qe^{-pt} - pe^{-qt}} \right)^{\mu_2/\alpha}. \quad (28)$$

If  $\mu_1 \ll 1$ , then

$$h_4(t) \approx \mu_0 X \mu_1 \left( \int_0^t (1 - S_2(t - u)) \right). \quad (29)$$

As before, let  $T^*$  denote the time to malignancy for a single clone, and let  $F^*(t)$  denote the cumulative distribution of this random variable. Under the 4-stage model, initiated (pre-malignant) clones cannot become extinct because  $S_2(t) \rightarrow 0$  as  $t \rightarrow \infty$ . Therefore,

$$F^*(t) = (1 - S_2(t)) \quad (30)$$

and  $T_s \equiv E[T^*]$  satisfies

$$T_s = \int_0^\infty S_2(u) du. \quad (31)$$

Following a similar argument as before, we can see that for  $1/\mu_1 > t \gg T_s$ , the 4-stage hazard can be approximated by

$$h_4(t) \approx \mu_0 X \mu_1 (t - T_s). \quad (32)$$

## E Parameter Estimates

Table 1: Parameter Estimates : Colorectal Cancer

| Parameter                                      |         | 3-stage model* ( $k = 3$ )   | 4-stage model ( $k = 4$ )    |
|------------------------------------------------|---------|------------------------------|------------------------------|
| slope <sup>†</sup><br>$\mu_0 X \mu_1 p_\infty$ | males   | 0.200e-03 (0.196,0.206)×e-03 | 0.195e-03 (0.187,0.204)×e-03 |
|                                                | females | 0.161e-03 (0.157,0.166)×e-03 | 0.198e-03 (0.185,0.213)×e-03 |
| $\alpha - \beta$                               | males   | 0.167 (0.165,0.170)          | 0.161 (0.157,0.165)          |
|                                                | females | 0.141 (0.138,0.144)          | 0.146 (0.141,0.151)          |
| $\mu_{k-2}/\alpha$                             | males   |                              | 1.379 (0.960,1.980)          |
|                                                | females |                              | 0.428 (0.342,0.535)          |
| $\mu_{k-1}/(1 - \beta/\alpha)$                 | males   | 0.145e-04 (0.132,0.158)×e-04 | 0.135e-04 (0.105,0.175)×e-04 |
|                                                | females | 0.427e-04 (0.388,0.469)×e-04 | 0.775e-04 (0.688,0.872)×e-04 |
| $\Delta \text{AIC}^\ddagger$                   | males   | 804.04                       | 819.87                       |
|                                                | females | 339.23                       | 401.84                       |

\* The 3-stage hazard depends also on  $\mu_1/\alpha$ , however this parameter is not identifiable when  $\mu_1/\alpha \ll 1$ . For the purpose of estimation, we assumed  $\mu_0 = \mu_1$  and  $\alpha = 9$ . The model fit is insensitive to the value of  $\alpha$  chosen, and can be rescaled as long as the slope remains unchanged.

† For the 4-stage model,  $p_\infty = 1$ .

‡  $\Delta \text{AIC}$  : relative to the Armitage-Doll model.  $\text{AIC (Akaike Information Criterion)} \approx -2 \times \log \mathcal{L}(\text{loglikelihood}) + 2 \times \text{no. of estimated parameters}$ .

## References

- [1] Luebeck, EG, Moolgavkar, SH (2002) Multistage carcinogenesis and the incidence of colorectal cancer. Proc. Natl. Acad. Sci. U S A 99:15095–15100.
- [2] Meza, R, Luebeck, EG, Moolgavkar, SH (2005) Gestational mutations and carcinogenesis. Math. Biosci. 197:188–210.

Table 2: Parameter Estimates : Pancreatic Cancer

| Parameter                                      |         | 3-stage model* ( $k = 3$ )   | 4-stage model ( $k = 4$ )    |
|------------------------------------------------|---------|------------------------------|------------------------------|
| slope <sup>†</sup><br>$\mu_0 X \mu_1 p_\infty$ | males   | 0.390e-04 (0.370,0.412)×e-04 | 0.468e-04 (0.385,0.570)×e-04 |
|                                                | females | 0.277e-04 (0.255,0.302)×e-04 | 0.273e-04 (0.250,0.298)×e-04 |
| $\alpha - \beta$                               | males   | 0.179 (0.172,0.187)          | 0.192 (0.177,0.208)          |
|                                                | females | 0.162 (0.156,0.168)          | 0.156 (0.148,0.164)          |
| $\mu_{k-2}/\alpha$                             | males   |                              | 0.401 (0.204,0.775)          |
|                                                | females |                              | 1.299 (0.680,3.480)          |
| $\mu_{k-1}/(1 - \beta/\alpha)$                 | males   | 0.138e-04 (0.107,0.178)×e-04 | 0.206e-04 (0.149,0.283)×e-04 |
|                                                | females | 0.178e-04 (0.148,0.214)×e-04 | 0.174e-04 (0.146,0.208)×e-04 |
| $\Delta AIC^\ddagger$                          | males   | 77.07                        | 84.56                        |
|                                                | females | 245.23                       | 232.76                       |

\* The 3-stage hazard depends also on  $\mu_1/\alpha$ , however this parameter is not identifiable when  $\mu_1/\alpha \ll 1$ . For the purpose of estimation, we assumed  $\mu_0 = \mu_1$  and  $\alpha = 9$ . The model fit is insensitive to the value of  $\alpha$  chosen, and can be rescaled as long as the slope remains unchanged.

† For the 4-stage model,  $p_\infty = 1$ .

‡  $\Delta AIC$  : relative to the Armitage-Doll model.

Table 3: Estimated Mean Sojourn Time,  $T_s$

| colorectal | 3-stage model | 4-stage model |
|------------|---------------|---------------|
| males      | 56.0          | 55.3          |
| females    | 57.5          | 64.0          |
| pancreas   | 3-stage model | 4-stage model |
| males      | 52.9          | 57.9          |
| females    | 56.3          | 55.8          |
